# Supplementary material for: Transcriptional Profile of Mycobacterium tuberculosis in an in vitro Model of Intraocular Tuberculosis
Source: Front Cell Infect Microbiol. 2018 Oct 2;8:330. doi: 10.3389/fcimb.2018.00330 (PMC6175983; doi:10.3389/fcimb.2018.00330)
Supplement: Supplementary Table 2 — Transcriptional signatures of M. tuberculosis in an in vitro model of IOTB. M. tuberculosis transcripts differentially regulated in each functional category in an in vitro model of IOTB at 3-day post infection. [file Table_2.XLSX]

## Sheet: Genes List
Table S2: Transcriptional signatures of M. tuberculosis in an in vitro model of IOTB. M. tb transcripts differentially regulated in each functional category in an in vitro model of IOTB at 3 day post infection.
# M. tb transcripts (UP and Down regulated) modulated in ARPE-19 cells and its respective Log2 Fold Change(FC) . Number in parenthesis denotes the total number of transcripts modulated in each category
# Light Red fill with Dark Red text boxes define common genes in comaprison to M. tb transcriptome in A549 infected cells (Ryndak MB et al, 2015)
# Yellow Fill with Dark Yellow text boxes define common genes in comaprison to M. tb transcriptome in HBMEC cells, Central nervous system (CNS)-TB model (Jain et al, 2006)
# Green Fill with Dark Green text boxes define common genes in comaprison to M. tb transcriptome in primary macrophages (Rhode et al, 2012). Note: We compared genes modulated(Up/dpwn) from this stage of infection and thus pooled reference data from Table S1, S2, S4, S5, S6,S7,S8, S9, S10 and MT list and repeated gene from each different table sets were omitted.
# Unhighlighted boxes are specific to this study (in vitro IOTB model)
# Grey Fill with Black text are found in other independent studies (dicsussed in manuscript)
# Note: The criterion for comparison was restricted to some in vitro studies. Additional genes could be common if compared to in vivo (animals) models of pulmonary TB/Extrapulmonary TB or human samples (sputum/lung tissue/specimens from EPTB sites) data.
M. tb intracellular transcriptome in ARPE-19 cells, 3-day post infection
Conserved Hypothetical						CW & CP						Intermediary Metabolism & Respiration						PE and PPE Family						Virulence & Detoxcification						Information Pathways						Lipid Metabolism						Regulatory Proteins						IS & Phages
UP (123)			Down (135)			UP (99)			Down (133)			UP (95)			Down (133)			UP (38)			Down (20)			UP (25)			Down (30)			UP (24)			Down (20)			UP (20)			Down (51)			UP (17)			Down (22)			UP (17)
Log FC ([Infected] Vs [Control])	Gene ID		Log FC ([Infected] Vs [Control])	Gene ID		Log FC ([Infected] Vs [Control])	Gene ID		Log FC ([Infected] Vs [Control])	Gene ID		Log FC ([Infected] Vs [Control])	Gene ID		Log FC ([Infected] Vs [Control])	Gene ID		Log FC ([Infected] Vs [Control])	Gene ID		Log FC ([Infected] Vs [Control])	Gene ID		Log FC ([Infected] Vs [Control])	Gene ID		Log FC ([Infected] Vs [Control])	Gene ID		Log FC ([Infected] Vs [Control])	Gene ID		Log FC ([Infected] Vs [Control])	Gene ID		Log FC ([Infected] Vs [Control])	Gene ID		Log FC ([Infected] Vs [Control])	Gene ID		Log FC ([Infected] Vs [Control])	Gene ID		Log FC ([Infected] Vs [Control])	Gene ID		Log FC ([Infected] Vs [Control])	Gene ID
6.55709	Rv2844		-4.05343	Rv1738		10.1231	Rv1230c		-2.94211	Rv3619c		7.69753	Rv2672		-3.40221	Rv2007c		9.53939	Rv3507		-2.60289	Rv3812		4.34609	Rv2238c		-4.24731	Rv2623		6.70216	Rv0631c		-2.56161	Rv2755c		4.69641	Rv0649		-2.56809	Rv3130c		3.72506	Rv0823c		-2.50033	Rv0377		4.74113	Rv0741
5.91862	Rv0775		-4.02365	Rv3131		9.30688	Rv1457c		-2.8999	Rv1459c		6.62499	Rv3340		-2.72185	Rv0773c		7.77279	Rv2099c		-2.32761	Rv1803c		4.29325	Rv2760c		-3.52841	Rv2031c		6.14441	Rv2056c		-2.51228	Rv3674c		4.02789	Rv0468		-2.42299	Rv3513c		2.66339	Rv1994c		-2.39094	Rv3143		4.33893	Rv2646
5.90944	Rv2541		-3.66278	Rv2032		9.07474	Rv2450c		-2.82699	Rv1539		5.84532	Rv2601		-2.68866	Rv3034c		7.38373	Rv1452c		-2.24464	Rv1548c		3.79128	Rv3500c		-3.32844	Rv1996		5.45394	Rv2793c		-2.49949	Rv2528c		3.95649	Rv3667		-2.36233	Rv1661		2.52649	Rv3765c		-2.23365	Rv0144		3.82295	Rv2652c
5.24307	Rv3566A		-3.62161	Rv0569		8.65804	Rv3663c		-2.82186	Rv1198		5.36926	Rv3419c		-2.68664	Rv1451		6.81254	Rv1396c		-2.20097	Rv2356c		3.69938	Rv0626		-3.08123	Rv3134c		5.10466	Rv2736c		-2.23843	Rv0736		3.91181	Rv1142c		-2.33453	Rv1182		2.32588	Rv3160c		-2.11262	Rv0078		3.80501	Rv2885c
4.87556	Rv1518		-3.02498	Rv3510c		7.22969	Rv3851		-2.76157	Rv2039c		4.64379	Rv1445c		-2.63923	Rv0253		5.83134	Rv2490c		-2.13703	Rv2608		3.68163	Rv1962c		-2.89165	Rv2005c		3.38845	Rv3459c		-2.18476	Rv1700		3.83228	Rv3088		-2.29569	Rv1662		2.15832	Rv2621c		-1.97371	Rv1534		3.1251	Rv2100
4.75957	Rv1540		-3.00157	Rv2410c		5.02641	Rv1845c		-2.7269	Rv0488		4.61475	Rv0149		-2.56031	Rv0198c		5.68904	Rv0279c		-2.12166	Rv1195		3.21328	Rv3418c		-2.44565	Rv0126		3.10011	Rv1329c		-2.09826	Rv2057c		2.89348	Rv1094		-2.29344	Rv2610c		1.8698	Rv1963c		-1.94803	Rv2176		3.05442	Rv2653c
4.75476	Rv0323c		-2.96031	Rv3600c		4.58011	Rv1456c		-2.65986	Rv2115c		4.35808	Rv3153		-2.54743	Rv0778		5.65615	Rv0746		-2.03213	Rv2107		3.11055	Rv1971		-2.24161	Rv1563c		3.09068	Rv3462c		-2.06922	Rv0944		2.61401	Rv0904c		-2.27492	Rv0088		1.79762	Rv1990c		-1.93372	Rv0195		2.44698	Rv0336
4.66357	Rv2414c		-2.79534	Rv3395c		3.81954	Rv2203		-2.62721	Rv0987		4.27424	Rv0422c		-2.53549	Rv3316		4.78555	Rv2487c		-2.01324	Rv1651c		2.9196	Rv3697c		-2.1136	Rv3497c		3.08053	Rv3721c		-1.92237	Rv2841c		2.35989	Rv0271c		-2.21007	Rv2262c		1.62662	Rv3416		-1.87641	Rv0117		2.41582	Rv2310
4.65948	Rv1752		-2.72686	Rv2030c		3.65079	Rv3444c		-2.53869	Rv1197		4.21395	Rv3119		-2.53454	Rv1602		4.59188	Rv1441c		-1.93765	Rv2162c		2.89295	Rv3269		-2.06524	Rv0240		2.82183	Rv2986c		-1.90826	Rv1537		2.34587	Rv2503c		-2.18104	Rv0673		1.60031	Rv1556		-1.8029	Rv0067c		2.28488	Rv0515
4.55815	Rv3654c		-2.66027	Rv0724A		3.58741	Rv1799		-2.52397	Rv3298c		4.20747	Rv2249c		-2.49041	Rv0840c		4.33867	Rv0388c		-1.8878	Rv3892c		2.75845	Rv0169		-2.04807	Rv1943c		2.49058	Rv3456c		-1.77082	Rv0003		2.25649	Rv1867		-2.15481	Rv1206		1.53665	Rv3164c		-1.73624	Rv3173c		2.20471	Rv2792c
4.44643	Rv1993c		-2.64762	Rv2628		3.57179	Rv2688c		-2.48466	Rv3620c		3.89538	Rv2677c		-2.4567	Rv0438c		4.31924	Rv3344c		-1.76437	Rv1789		2.73695	Rv2493		-1.93919	Rv0550c		2.42345	Rv0071		-1.76204	Rv2737c		2.12623	Rv0129c		-2.15079	Rv3392c		1.49384	Rv0232		-1.72046	Rv3830c		2.03972	Rv2086
4.24522	Rv1907c		-2.64062	Rv3127		3.52517	Rv2235		-2.48442	Rv3665c		3.848	Rv0044c		-2.43187	Rv0828c		3.94649	Rv3590c		-1.64162	Rv1196		2.63793	Rv2063A		-1.81502	Rv3168		2.02797	Rv1630		-1.64766	Rv1547		2.10197	Rv0456c		-2.13417	Rv1822		1.41329	Rv0602c		-1.68869	Rv0491		2.02576	Rv1588c
4.01012	Rv2828A		-2.48291	Rv2411c		3.51664	Rv0677c		-2.3889	Rv2347c		3.35334	Rv0070c		-2.43004	Rv0565c		3.63266	Rv1646		-1.64107	Rv2328		2.55136	Rv1839c		-1.814	Rv2530c		1.89198	Rv0720		-1.56342	Rv0041		1.78814	Rv0564c		-2.00617	Rv0975c		1.40859	Rv0902c		-1.68567	Rv1675c		2.01319	Rv3430c
3.72782	Rv2803		-2.46504	Rv2627c		3.47173	Rv0870c		-2.34893	Rv0835		3.33924	Rv2467		-2.42276	Rv0062		3.47858	Rv2591		-1.63677	Rv2340c		2.3162	Rv0592		-1.80454	Rv1494		1.88773	Rv2191		-1.55015	Rv0427c		1.68944	Rv1528c		-2.0059	Rv0231		1.3724	Rv1129c		-1.68034	Rv0042c		1.75054	Rv0397
3.71949	Rv0381c		-2.4069	Rv0106		3.46937	Rv2301		-2.34233	Rv2835c		3.2862	Rv0548c		-2.40292	Rv0416		3.44082	Rv1768		-1.58374	Rv2769c		2.25702	Rv0588		-1.72853	Rv1838c		1.80954	Rv3911		-1.49	Rv3024c		1.65558	Rv1344		-2.00086	Rv3562		1.34728	Rv2324		-1.67743	Rv1027c		1.60481	Rv2014
3.56354	Rv2283		-2.37032	Rv2372c		3.40335	Rv2265		-2.33807	Rv3435c		3.17678	Rv3712		-2.37726	Rv0389		3.37161	Rv1450c		-1.50637	Rv1807		2.14318	Rv3176c		-1.70468	Rv0064A		1.76723	Rv0685		-1.46172	Rv1650		1.53188	Rv0230c		-1.98647	Rv1350		1.29427	Rv3183		-1.62706	Rv2175c		1.44505	Rv1578c
3.56331	Rv2295		-2.31767	Rv1455		3.37055	Rv1972		-2.32997	Rv0838		3.13606	Rv0197		-2.34185	Rv3230c		3.03049	Rv1243c		-1.44145	Rv2352c		1.9953	Rv0959A		-1.69591	Rv2142A		1.75104	Rv0979A		-1.40125	Rv1388		1.52327	Rv1175c		-1.9799	Rv3824c		1.27251	Rv3833		-1.61105	Rv2914c		1.38568	Rv1576c
3.53361	Rv2079		-2.29877	Rv2491		3.35712	Rv1496		-2.31122	Rv0362		3.08145	Rv0764c		-2.29676	Rv2899c		2.97227	Rv0578c		-1.44061	Rv2108		1.87556	Rv1967		-1.6848	Rv2063		1.65591	Rv3287c		-1.39878	Rv1640c		1.38328	Rv3480c		-1.97059	Rv3234c					-1.58567	Rv1479
3.5306	Rv0295c		-2.29367	Rv1116A		3.31788	Rv2290		-2.3083	Rv3197		3.00382	Rv3279c		-2.28602	Rv0782		2.96782	Rv3622c		-1.43517	Rv0285		1.81232	Rv1982A		-1.67115	Rv3082c		1.62622	Rv3012c		-1.35954	Rv2357c		1.35798	Rv3740c		-1.96446	Rv1135A					-1.5392	Rv3133c
3.48539	Rv2638		-2.26828	Rv1059		3.3126	Rv1997		-2.2958	Rv1343c		2.99486	Rv2782c		-2.28009	Rv1412		2.8447	Rv3621c		-1.34362	Rv1788		1.72587	Rv1026		-1.57779	Rv2550c		1.583	Rv1642		-1.32671	Rv1633		1.34485	Rv1750c		-1.95604	Rv2940c					-1.52702	Rv1846c
3.48345	Rv0579		-2.25673	Rv2558		3.28069	Rv3194c		-2.27407	Rv0308		2.83213	Rv0728c		-2.27964	Rv3315c		2.7585	Rv3746c					1.70229	Rv2104c		-1.5747	Rv2427A		1.57784	Rv3328c								-1.93455	Rv3383c					-1.52325	Rv0903c
3.42361	Rv1158c		-2.24539	Rv2077A		3.25387	Rv3808c		-2.23788	Rv0290		2.83148	Rv3673c		-2.27798	Rv1485		2.73955	Rv0442c					1.58115	Rv3384c		-1.48283	Rv0659c		1.48948	Rv0700								-1.91364	Rv3399					-1.49965	Rv3575c
3.41405	Rv3488		-2.24499	Rv1339		3.2236	Rv1233c		-2.23769	Rv2833c		2.81443	Rv0561c		-2.24701	Rv0697		2.47373	Rv1801					1.46145	Rv2829c		-1.45631	Rv1953		1.41638	Rv2572c								-1.86308	Rv3233c
3.38859	Rv2820c		-2.20295	Rv1514c		3.1664	Rv2999		-2.23337	Rv0288		2.70581	Rv2537c		-2.2177	Rv0869c		2.42127	Rv3872					1.43662	Rv2028c		-1.44166	Rv3759c		1.30376	Rv1364c								-1.82464	Rv1527c
3.36992	Rv3769		-2.19931	Rv1949c		3.09777	Rv2091c		-2.21119	Rv1792		2.68974	Rv1383		-2.21715	Rv3359		2.36585	Rv0872c					1.42642	Rv1952		-1.43771	Rv0174											-1.80023	Rv0830
3.36128	Rv0807		-2.19585	Rv2369c		3.07579	Rv1607		-2.20058	Rv3632		2.63614	Rv1240		-2.19868	Rv1454c		2.30388	Rv1168c								-1.43008	Rv2863											-1.77412	Rv1683
3.29086	Rv3188		-2.19161	Rv2275		3.02699	Rv0411c		-2.19301	Rv0236c		2.60864	Rv1373		-2.19654	Rv1163		2.20791	Rv3653								-1.42426	Rv2581c											-1.75698	Rv3229c
3.27463	Rv3707c		-2.18683	Rv1813c		2.96759	Rv2875		-2.19126	Rv0522		2.56373	Rv1853		-2.19439	Rv1213		2.18662	Rv1790								-1.40039	Rv1965											-1.73123	Rv2382c
3.20221	Rv3180c		-2.18644	Rv3195		2.94286	Rv2692		-2.18709	Rv3020c		2.54764	Rv2874		-2.19422	Rv2855		1.88279	Rv2396								-1.36146	Rv2862A											-1.72218	Rv2612c
3.0273	Rv1314c		-2.17511	Rv3541c		2.76736	Rv2994		-2.13701	Rv2163c		2.52717	Rv3329		-2.16454	Rv3158		1.8624	Rv2408								-1.35629	Rv0798c											-1.71991	Rv2931
2.98799	Rv0580c		-2.16894	Rv2054		2.72916	Rv2571c		-2.12247	Rv0929		2.46185	Rv1555		-2.1421	Rv3313c		1.77561	Rv1759c																				-1.70694	Rv2247
2.9753	Rv2305		-2.13729	Rv3351c		2.65019	Rv1910c		-2.12172	Rv1237		2.43581	Rv2460c		-2.1216	Rv1187		1.77134	Rv3350c																				-1.68696	Rv3791
2.96474	Rv2573		-2.13173	Rv2699c		2.64134	Rv1758		-2.11632	Rv2920c		2.40881	Rv2962c		-2.11438	Rv3914		1.7567	Rv2126c																				-1.65591	Rv1529
2.87892	Rv1354c		-2.11241	Rv3900c		2.57774	Rv1435c		-2.09965	Rv1749c		2.40851	Rv0478		-2.1098	Rv1523		1.68381	Rv1808																				-1.59225	Rv3139
2.86733	Rv0698		-2.10127	Rv0257		2.56362	Rv2564		-2.09731	Rv0116c		2.38949	Rv0510		-2.10807	Rv1212c		1.59933	Rv0297																				-1.57038	Rv1935c
2.85684	Rv2797c		-2.09726	Rv2022c		2.54802	Rv3802c		-2.09479	Rv1038c		2.35165	Rv1426c		-2.09228	Rv0794c		1.53891	Rv1325c																				-1.56982	Rv0551c
2.85167	Rv3770c		-2.07066	Rv2774c		2.52629	Rv0538		-2.08622	Rv2846c		2.34736	Rv1755c		-2.0832	Rv3393		1.31432	Rv0832																				-1.56865	Rv0855
2.81267	Rv2406c		-2.06084	Rv0276		2.51494	Rv1231c		-2.06531	Rv3310		2.34569	Rv1017c		-2.07724	Rv1335		1.27172	Rv3135																				-1.55269	Rv2934
2.78753	Rv1684		-2.04662	Rv3075c		2.51332	Rv3695		-2.03973	Rv1671		2.34349	Rv1552		-2.06847	Rv2747																							-1.51854	Rv3563
2.73309	Rv3586		-2.04211	Rv2288		2.41395	Rv2153c		-2.02591	Rv3454		2.32436	Rv0848		-2.06105	Rv1850																							-1.51118	Rv2724c
2.71528	Rv1204c		-2.03182	Rv2569c		2.38471	Rv2333c		-2.01634	Rv1238		2.32381	Rv1011		-2.04054	Rv1077																							-1.50435	Rv1136
2.7022	Rv2255c		-2.01992	Rv2626c		2.37674	Rv2643		-2.01497	Rv0412c		2.30383	Rv2775		-2.03066	Rv1248c																							-1.49206	Rv2002
2.67286	Rv2917		-2.01012	Rv0434		2.36826	Rv2306B		-2.00985	Rv2937		2.30228	Rv0187		-2.0155	Rv0663																							-1.4699	Rv1193
2.60852	Rv3813c		-2.00999	Rv2315c		2.35207	Rv2046		-1.99577	Rv1793		2.29225	Rv0322		-2.00108	Rv2867c																							-1.46766	Rv3141
2.59444	Rv2240c		-1.99085	Rv0760c		2.34968	Rv2772c		-1.9808	Rv2346c		2.29122	Rv2192c		-2.00046	Rv0694																							-1.43097	Rv3506
2.57294	Rv3861		-1.97755	Rv3472		2.17578	Rv0192A		-1.97975	Rv2459		2.27928	Rv3147		-1.99372	Rv3389c																							-1.41751	Rv0644c
2.5682	Rv2179c		-1.97743	Rv3008		2.15771	Rv1401		-1.9705	Rv2320c		2.2317	Rv2221c		-1.98448	Rv3377c																							-1.35078	Rv3564
2.56045	Rv0395		-1.97699	Rv3237c		2.13509	Rv2980		-1.96917	Rv1086		2.22841	Rv1723		-1.98278	Rv3199c																							-1.34854	Rv3799c
2.40465	Rv3850		-1.95837	Rv1998c		2.06291	Rv2796c		-1.96759	Rv1779c		2.2178	Rv0245		-1.97383	Rv3150																							-1.3473	Rv1071c
2.39415	Rv0368c		-1.95283	Rv0614		2.06087	Rv3271c		-1.9522	Rv2209		2.21057	Rv2118c		-1.97313	Rv2499c																							-1.25038	Rv0436c
2.37955	Rv3471c		-1.95154	Rv2148c		2.05405	Rv1860		-1.94708	Rv3382c		2.20767	Rv2753c		-1.96643	Rv1092c																							-1.23712	Rv3409c
2.35506	Rv2898c		-1.92421	Rv1116		2.05223	Rv1291c		-1.94537	Rv0821c		2.19677	Rv2392		-1.96632	Rv2131c
2.34388	Rv3122		-1.92112	Rv0493c		2.03978	Rv1481		-1.94273	Rv3483c		2.16713	Rv0306		-1.96016	Rv0369c
2.28792	Rv3235		-1.90209	Rv0572c		1.99769	Rv3760		-1.93839	Rv3630		2.12124	Rv1872c		-1.95832	Rv1923
2.2283	Rv1378c		-1.89098	Rv3098c		1.99177	Rv1744c		-1.9261	Rv3869		2.11122	Rv1771		-1.95324	Rv2349c
2.16463	Rv1466		-1.85205	Rv3292		1.9901	Rv2273		-1.92251	Rv1424c		2.10565	Rv2095c		-1.9472	Rv3762c
2.15267	Rv1262c		-1.84956	Rv1780		1.96477	Rv1271c		-1.90197	Rv3901c		2.08229	Rv0696		-1.9346	Rv3565
2.13521	Rv1676		-1.84442	Rv1535		1.95614	Rv0402c		-1.89593	Rv0320		2.07206	Rv3161c		-1.92145	Rv0370c
2.10072	Rv3845		-1.83962	Rv0740		1.94021	Rv0518		-1.89345	Rv0114		1.98063	Rv2393		-1.91108	Rv2669
2.09514	Rv3376		-1.8345	Rv3311		1.9357	Rv2553c		-1.88531	Rv3445c		1.93849	Rv1389		-1.90843	Rv1736c
2.09352	Rv0034		-1.83138	Rv3165c		1.92467	Rv1226c		-1.86979	Rv1281c		1.92782	Rv1005c		-1.8829	Rv1621c
2.05499	Rv0448c		-1.82209	Rv2023c		1.92285	Rv3657c		-1.85986	Rv1733c		1.87874	Rv3579c		-1.88068	Rv3356c
2.05302	Rv1069c		-1.81862	Rv0123		1.87296	Rv1591		-1.85781	Rv3875		1.8369	Rv2294		-1.87235	Rv0769
2.03596	Rv1879		-1.81129	Rv1680		1.87254	Rv0200		-1.85295	Rv1730c		1.82823	Rv2194		-1.86637	Rv0133
2.03232	Rv0378		-1.80955	Rv0259c		1.86084	Rv3910		-1.84225	Rv0202c		1.81008	Rv3582c		-1.83008	Rv0013
2.00733	Rv2551c		-1.79779	Rv2078		1.84416	Rv1946c		-1.83733	Rv0482		1.79056	Rv0462		-1.8278	Rv1001
1.95435	Rv2449c		-1.79024	Rv0695		1.80014	Rv1678		-1.83158	Rv0194		1.78781	Rv2674		-1.82597	Rv0567
1.94623	Rv3839		-1.76504	Rv1645c		1.79916	Rv1737c		-1.83142	Rv3894c		1.7867	Rv2321c		-1.82505	Rv2070c
1.92406	Rv3706c		-1.76204	Rv0356c		1.76969	Rv3905c		-1.82406	Rv2403c		1.78556	Rv1178		-1.79826	Rv2583c
1.89717	Rv0837c		-1.74788	Rv1513		1.76345	Rv3795		-1.82316	Rv1280c		1.77861	Rv3534c		-1.79558	Rv3700c
1.89589	Rv3796		-1.74322	Rv2695		1.7422	Rv3823c		-1.81222	Rv0622		1.76915	Rv0316		-1.79556	Rv0766c
1.89419	Rv2472		-1.74064	Rv1725c		1.72424	Rv1992c		-1.81079	Rv2152c		1.75936	Rv3299c		-1.7863	Rv1833c
1.87406	Rv1137c		-1.72917	Rv2409c		1.7187	Rv3807c		-1.80634	Rv0593		1.74462	Rv0087		-1.78498	Rv3324A
1.85167	Rv0756c		-1.7276	Rv1829		1.71201	Rv3065		-1.80052	Rv2154c		1.73016	Rv3232c		-1.78465	Rv1164
1.84502	Rv2529		-1.72081	Rv2417c		1.69858	Rv1884c		-1.79756	Rv3069		1.68405	Rv3634c		-1.77889	Rv2786c
1.83857	Rv2827c		-1.71493	Rv3096		1.68575	Rv1081c		-1.79104	Rv1418		1.68293	Rv2776c		-1.77802	Rv1559
1.83749	Rv1597		-1.71484	Rv1670		1.63769	Rv2916c		-1.77937	Rv1228		1.67034	Rv3581c		-1.77491	Rv1144
1.83421	Rv1504c		-1.71197	Rv2402		1.63118	Rv1541c		-1.77142	Rv0930		1.66523	Rv3726		-1.77185	Rv3032
1.83097	Rv3120		-1.70549	Rv0038		1.61644	Rv3789		-1.75356	Rv1101c		1.63001	Rv2280		-1.74907	Rv3261
1.82107	Rv3207c		-1.69983	Rv1734c		1.59976	Rv1146		-1.74993	Rv0907		1.60639	Rv3149		-1.74203	Rv3591c
1.82015	Rv1225c		-1.69876	Rv0274		1.59648	Rv3004		-1.74974	Rv0621		1.60323	Rv3154		-1.73086	Rv3068c
1.79011	Rv2557		-1.69169	Rv1429		1.58561	Rv0343		-1.73814	Rv3265c		1.57861	Rv2971		-1.72957	Rv3685c
1.77484	Rv3103c		-1.68583	Rv2405		1.5688	Rv1166		-1.72465	Rv2395		1.55663	Rv3303c		-1.72134	Rv0777
1.77122	Rv1111c		-1.68267	Rv1159A		1.53806	Rv1704c		-1.71928	Rv1782		1.53487	Rv0085		-1.70413	Rv1940
1.76633	Rv2983		-1.68084	Rv3362c		1.53706	Rv0115		-1.7143	Rv0556		1.53323	Rv0793		-1.7041	Rv1609
1.75499	Rv1571		-1.67814	Rv2751		1.50907	Rv0292		-1.71363	Rv3239c		1.47818	Rv1393c		-1.67627	Rv1526c
1.74295	Rv2469c		-1.67587	Rv0785		1.50072	Rv0879c		-1.71079	Rv1273c		1.4439	Rv0382c		-1.67452	Rv1326c
1.72879	Rv2082		-1.6715	Rv0376c		1.47234	Rv2341		-1.70562	Rv0531		1.42412	Rv0953c		-1.6691	Rv3777
1.67647	Rv0759c		-1.67098	Rv2425c		1.4132	Rv0379		-1.70415	Rv3891c		1.39658	Rv1826		-1.66132	Rv0816c
1.67261	Rv0613c		-1.65763	Rv1515c		1.41007	Rv3070		-1.70066	Rv1312		1.35028	Rv3677c		-1.64934	Rv0819
1.66754	Rv0185		-1.65141	Rv0492A		1.38379	Rv2687c		-1.6894	Rv3016		1.3183	Rv3155		-1.64524	Rv1613
1.66156	Rv0883c		-1.6428	Rv2717c		1.37828	Rv2181		-1.68939	Rv3781		1.24941	Rv0851c		-1.64233	Rv3248c
1.64846	Rv1065		-1.64172	Rv0080		1.36386	Rv2361c		-1.68751	Rv2686c		1.23987	Rv1512		-1.63335	Rv0517
1.6308	Rv1930c		-1.63682	Rv3722c		1.3555	Rv3806c		-1.68512	Rv0473		1.15745	Rv3175		-1.62265	Rv2604c
1.62672	Rv0689c		-1.61565	Rv2418c		1.31403	Rv0039c		-1.67029	Rv0284		1.14331	Rv0414c		-1.62129	Rv1104
1.6186	Rv2413c		-1.60557	Rv0836c		1.31234	Rv1075c		-1.64869	Rv2698					-1.61288	Rv1844c
1.61296	Rv3896c		-1.59528	Rv2631		1.30827	Rv0463		-1.64107	Rv2721c					-1.60778	Rv2913c
1.60393	Rv1954c		-1.59314	Rv2522c		1.19249	Rv0008c		-1.62977	Rv0344c					-1.59683	Rv3085
1.57822	Rv2896c		-1.58856	Rv3364c		1.17998	Rv0309		-1.6108	Rv3346c					-1.59457	Rv1161
1.5619	Rv1341		-1.58698	Rv2309A					-1.60597	Rv2389c					-1.58529	Rv2196
1.55167	Rv3446c		-1.57834	Rv1331					-1.59989	Rv1619					-1.57566	Rv0560c
1.54786	Rv3699		-1.55989	Rv1673c					-1.59805	Rv0955					-1.57021	Rv2071c
1.52527	Rv3656c		-1.55521	Rv1125					-1.5974	Rv2585c					-1.55946	Rv1712
1.52225	Rv0502		-1.53457	Rv0079					-1.59629	Rv2668					-1.55629	Rv2263
1.51468	Rv1288		-1.52481	Rv3212					-1.59232	Rv3876					-1.52664	Rv0669c
1.5088	Rv0049		-1.52319	Rv2474c					-1.57617	Rv3000					-1.50806	Rv0772
1.50857	Rv0433		-1.51187	Rv2478c					-1.56752	Rv3887c					-1.4982	Rv0089
1.50363	Rv3403c		-1.50293	Rv3672c					-1.5539	Rv1139c					-1.49148	Rv1658
1.48174	Rv3091		-1.50025	Rv3404c					-1.54627	Rv2684					-1.48601	Rv0802c
1.45827	Rv0990c		-1.49631	Rv2375					-1.54598	Rv2625c					-1.47119	Rv3027c
1.45133	Rv3067		-1.49582	Rv2683					-1.54405	Rv3885c					-1.46806	Rv0729
1.43643	Rv2422		-1.48731	Rv2239c					-1.53397	Rv1735c					-1.4638	Rv1843c
1.4113	Rv3365c		-1.48457	Rv1765c					-1.53322	Rv2563					-1.45013	Rv1162
1.40795	Rv3433c		-1.47522	Rv3612c					-1.52424	Rv0287					-1.43496	Rv0619
1.37183	Rv0312		-1.4733	Rv2004c					-1.51741	Rv0112					-1.41736	Rv1714
1.32083	Rv3527		-1.45551	Rv2777c					-1.51571	Rv0806c					-1.41498	Rv0392c
1.28221	Rv3748		-1.44543	Rv0965c					-1.51136	Rv3238c					-1.39799	Rv1695
1.24735	Rv2716		-1.43422	Rv3655c					-1.4917	Rv1797					-1.39679	Rv2701c
1.20849	Rv2661c		-1.43307	Rv0574c					-1.49124	Rv0261c					-1.38376	Rv0809
1.20345	Rv2286c		-1.40859	Rv2570					-1.47538	Rv2318					-1.37995	Rv2322c
1.19556	Rv1367c		-1.40087	Rv0745					-1.44656	Rv0173					-1.37839	Rv0118c
1.18675	Rv1888A		-1.37555	Rv0307c					-1.44026	Rv3635					-1.37738	Rv1380
1.18587	Rv3192		-1.37076	Rv2705c					-1.40678	Rv2834c					-1.33259	Rv3255c
			-1.36256	Rv0571c					-1.38036	Rv3880c					-1.33196	Rv1656
			-1.36152	Rv1836c					-1.37267	Rv2038c					-1.33111	Rv3305c
			-1.35359	Rv3360					-1.36497	Rv2864c					-1.32179	Rv0654
			-1.33638	Rv1205					-1.36402	Rv3904c					-1.3105	Rv3397c
			-1.30158	Rv3033					-1.34866	Rv2398c					-1.30663	Rv0573c
			-1.29862	Rv2172c					-1.33087	Rv2041c					-1.30375	Rv3203
			-1.26883	Rv0193c					-1.32829	Rv2869c					-1.27637	Rv3401
			-1.26152	Rv3847					-1.30059	Rv2518c					-1.2712	Rv0132c
			-1.25642	Rv2618					-1.2893	Rv0961					-1.22628	Rv0373c
			-1.25172	Rv3714c					-1.15207	Rv0072					-1.20382	Rv2066
			-1.23572	Rv2891
			-1.18418	Rv2260
